# Supplementary material for: Kriteriumsbezogene Cut-Off-Werte für Tätigkeitsspielraum und Arbeitsintensität
Source: Atypon-hosted journal article supplement (doi:10.1026/0012-1924/a000226), 2019-02-01
Supplement: 0012-1924_a000226_esm1.pdf [file 0012-1924_a000226_esm1.pdf]

## Elektronisches Supplement 1

### Detaillierte objektive Datenerhebung

Die beiden Arbeitsmerkmale Tätigkeitsspielraum und Arbeitsintensität wurden subjektiv, d. h. über die Wahrnehmung der Arbeitsplatzinhaber und objektiv, d. h. über Expertenbeurteilungen, anhand verankerter Skalen für Arbeitsmerkmale, erfasst. Die Experten waren bei der objektiven Erhebung Arbeitspsychologinnen und Arbeitspsychologen, die in der Durchführung von objektiv-bedingungsbezogenen Arbeitsplatzuntersuchungen geschult wurden.

Zur Erfassung des objektiven Tätigkeitsspielraums und der objektiven Arbeitsintensität sowie der damit verbundenen Gruppierung in gut gestaltete oder schlecht gestaltete Arbeitsmerkmale wurden ausgewählte Skalen des *Tätigkeitsbewertungssystems Geistiger Arbeit* (TBS-GA; Hacker, Fritzsche, Richter & Iwanowa, 1995) und eine Skala aus dem *Rechnergestützten Dialogverfahren zur psychologischen Bewertung von Arbeitsinhalten* (REBA; Pohlandt, Jordan, Rehnisch & Richter, 1996) verwendet. Das REBA baut auf dem TBS-GA auf und besitzt das gleiche Antwortformat. Die Einstufung der Teil- und Gesamttätigkeiten erfolgte unabhängig von den Arbeitenden durch entsprechend geschulte Arbeitspsychologinnen und Arbeitspsychologen hinsichtlich der Ausführungsbedingungen mittels fest verankerter Skalen. Hierzu wurden Beobachtungsinterviews direkt am Arbeitsplatz durchgeführt. Zur Operationalisierung des objektiven Tätigkeitsspielraums wurden die von Gebele, Morling, Rösler und Rau (2011) erarbeiteten fünf TBS-GA-Skalen genutzt, welche im Elektronischen Supplement 1 Tabelle 1 dargestellt sind. Für jede Skala ergab sich ein Wert zwischen Null und Eins, wobei Eins die optimalste Ausprägung darstellt. Die fünf Skalen-Werte wurden, Gebele et al. (2011) entsprechend, zu einem Mittelwert für den objektiven Tätigkeitsspielraum aggregiert. Die Gruppierung in hohen bzw. gut gestalteten oder niedrigen bzw. schlecht gestalteten Tätigkeitsspielraum erfolgte anschließend anhand des sogenannten mittleren unkritischen Wertes. Dieser wurde aus den fünf unkritischen Werten der Skalen nach den Vorgaben des TBS-GA aggregiert. Dabei bedeutet unkritisch, dass die Ausprägung des untersuchten Arbeitsmerkmals (Skala) und des Gesamtkonstrukts beeinträchtigungsfreies Arbeiten zulässt (beanspruchungsoptimal nach DIN EN ISO 6385, 2016).

Nach Rau (2012) sowie Rau und Göllner (2018) ergibt sich Arbeitsintensität aus dem Verhältnis der geforderten Arbeitsmenge pro verfügbarer Zeit und dem kognitiven Regulationsniveau, wobei die verfügbare Zeit durch Regulationshindernisse, wie Störungen, keine Vorhersehbarkeit von Handlungserfordernissen sowie widersprüchliche Anforderungen beeinflusst wird. Für Tätigkeiten mit gleichem kognitiven Regulationsniveau steigt die Arbeitsintensität entweder durch die Erhöhung der Arbeitsmenge oder durch die Reduktion der verfügbaren Zeit. In Bezug auf das Regulationsniveau bzw. die hierarchische Vollständigkeit haben sich zwar Zusammenhänge mit positiven Beanspruchungsfolgen gezeigt (Hacker & Sachse, 2014), aber in Verbindung mit einem ungünstigen Verhältnis von Arbeitsmenge zu verfügbarer Zeit ist bei intellektuell fordernderen Tätigkeiten von einer höheren Arbeitsintensität auszugehen als bei einfachen ausführenden Tätigkeiten. Das liegt vor allem daran, dass höhere kognitive Anforderungen dazu führen, dass weniger Arbeit pro Zeiteinheit geleistet werden kann (Rau, 2012). Zusätzlich führt die Erfassung des kognitiven Regulationsniveaus zu einer besseren Passung zwischen objektiver und subjektiver Messung, da im Sinne des FIT unter Arbeitsintensität auch die

Schwierigkeit von Anforderungen verstanden wird. Diesen Erkenntnissen folgend, setzt sich die objektive Skala der Arbeitsintensität aus zwei Skalen von Gebele et al. (2011) *Störungen/Unterbrechungen der Arbeitstätigkeit* und der REBA-Zusatzskala: *Inhaltlich und zeitlich widersprüchliche Anforderungen* sowie drei neu hinzugefügten Skalen, welche der Arbeitsintensitätsdefinition von Rau (2012) sowie Rau & Göllner (2018) folgen, zusammen (Elektronisches Supplement 1 Tabelle 1). Mit der Zusatzskala *Überstunden*, welche bewertet ob Überstunden gemacht werden, wird zudem auch die Forderung nach der Erfassung der Arbeitsmenge von Gebele et al. (2011) erfüllt. Überstunden zeigen in aller Regel an, dass die Arbeitsmenge zu hoch für die verfügbare Zeit ist. Die Ursachen oder Motive für die Überstunden sind hier explizit nicht berücksichtigt, sondern nur im Sinne des quantitativen Verhältnisses von Arbeitsmenge zur verfügbaren Zeit zu verstehen. Äquivalent zu dem Vorgehen beim objektiven Tätigkeitsspielraum wurden die fünf Einzelskalen zu einem Mittelwert für die objektive Arbeitsintensität aggregiert. Die Gruppierung in hohe bzw. schlecht gestaltete Arbeitsintensität und geringe bzw. gut gestaltete Arbeitsintensität erfolgte auch hier anhand des mittleren unkritischen Wertes, welcher sich aus den einzelnen unkritischen Werten nach TBS-GA und somit aus den Forderungen der DIN EN ISO 6385 (2016) ergibt. Unkritisch bedeutet auch hier, dass die Ausprägung des untersuchten Arbeitsmerkmals (Skala) und des Gesamtkonstrukts beeinträchtigungsfreies Arbeiten zulässt. Die Gruppeneinteilungen haben die Grundlage für die weiteren statistischen Auswertungen und die damit verbundene Berechnungen der Cut-Off-Werte geliefert.

Tabelle 1

*TBS-GA/REBA-Skalen zur Operationalisierung von objektiven Tätigkeitsspielraum und objektiver Arbeitsintensität*

| Konstrukt                      | TBS-GA/REBA-Skalen                                                                                                                                                                                                                                                                   |
|--------------------------------|--------------------------------------------------------------------------------------------------------------------------------------------------------------------------------------------------------------------------------------------------------------------------------------|
| objektiver Tätigkeitsspielraum | inhaltliche Freiheitsgrade<br>mögliche bzw. erforderliche Entscheidungen<br>Vorbildungsnutzung<br>bleibende Lernerfordernisse<br>REBA-Zusatzskala: Beteiligung                                                                                                                       |
| objektive Arbeitsintensität    | Störungen/Unterbrechungen der Arbeitstätigkeit<br>REBA-Zusatzskala: Inhaltlich und zeitlich widersprüchliche Anforderungen<br>Vorhersehbarkeit der Ereignisse, die ein Handeln erfordern<br>Zusatzskala-Überstunden<br>DS Sammelskala: geistige (kognitive) Anforderungen (umgepolt) |

## Literatur

DIN EN ISO 6385. (2016). *Grundsätze der Ergonomie für die Gestaltung von Arbeitssystemen – Ersatz für DIN EN ISO 6385:2004-05*. Berlin: Beuth.

- Gebele, N., Morling, K., Rösler, U. & Rau, R. (2011). Objektive Erfassung von Job Demands und Decision Latitude sowie Zusammenhänge der Tätigkeitsmerkmale mit Erholungsunfähigkeit. *Zeitschrift für Arbeits- u. Organisationspsychologie*, 55, 32–45. <https://doi.org/10.1026/0932-4089/a000036>
- Hacker, W., Fritzsche, B., Richter, P. & Iwanowa, A. (1995). *Tätigkeitsbewertungssystem (TBS). Verfahren zur Analyse, Bewertung und Gestaltung von Arbeitstätigkeiten*. Zürich und Stuttgart: Verlag der Fachvereine und Teubner.
- Hacker, W. & Sachse, P. (2014). *Allgemeine Arbeitspsychologie: Psychische Regulation von Tätigkeiten (3. Auflg.)*. Göttingen: Hogrefe.
- Pohlandt, A., Jordan, P., Rehnisch, G. & Richter, P. (1996). REBA – Ein rechnergestütztes Verfahren für die psychologische Arbeitsbewertung und -gestaltung. *Zeitschrift für Arbeits- und Organisationspsychologie*, 40, 63–74.
- Rau, R. (2012). Erholung als Indikator für gesundheitsförderlich gestaltete Arbeit. In B. Badura, A. Ducki, H. Schröder, J. Klose & M. Meyer (Hrsg.), *Fehlzeiten-Report 2012* (S. 181–190). Berlin: Springer. [https://doi.org/10.1007/978-3-642-29201-9\\_19](https://doi.org/10.1007/978-3-642-29201-9_19)
- Rau, R. & Göllner, C. (2018). Rahmenmodell der Arbeitsintensität als objektiv bestehende Anforderung. *Arbeit*, 27, 151–174. <https://doi.org/10.1515/arbeit-2018-0012>
