# Supplementary material for: Kriteriumsbezogene Cut-Off-Werte für Tätigkeitsspielraum und Arbeitsintensität
Source: Atypon-hosted journal article supplement (doi:10.1026/0012-1924/a000226), 2019-02-01

### Elektronisches Supplement 3

ROC-Kurve für den FIT-Tätigkeitsspielraum (durchgängige Linie); die Hauptdiagonale (graue Line) und die obere und untere Grenze des 95%-Konfidenzintervalls (gestrichelte Linien)

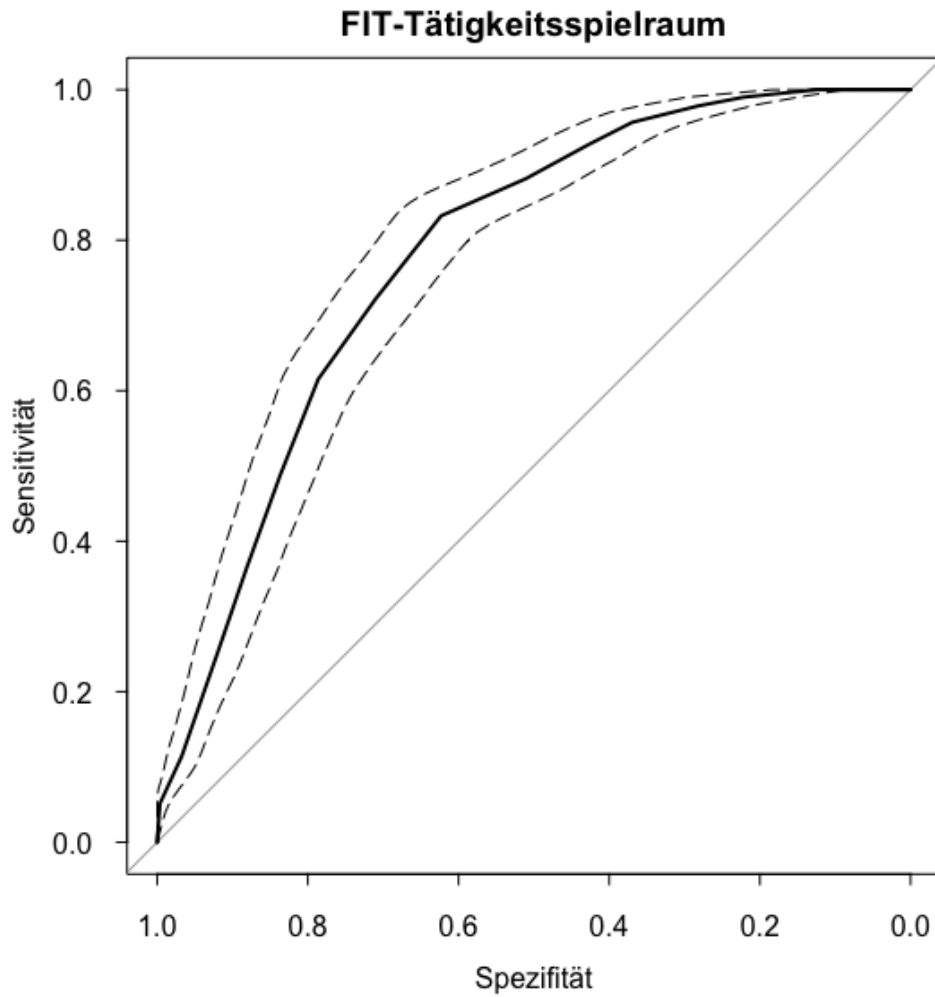

Supplement: 0012-1924_a000226_esm3.pdf [file 0012-1924_a000226_esm3.pdf]
